# Supplementary material
Source: PubMed Central journal article supplement (PMC5820025)
Supplement: NIHMS919654-supplement-supplement_1.pdf [file NIHMS919654-supplement-supplement_1.pdf]

**Supplement Table 1. Association between childhood abuse and posttraumatic stress disorder (PTSD) <sup>a</sup> assessed by the PTSD Check List - Civilian Version (PCL-C) during pregnancy (N = 2,928)**

|                         | No PTSD<br>(N = 2746) |      | PTSD<br>(N = 182) |      |                           |                                      |                                      |
|-------------------------|-----------------------|------|-------------------|------|---------------------------|--------------------------------------|--------------------------------------|
|                         | n                     | %    | n                 | %    | Unadjusted OR<br>(95% CI) | Adjusted OR<br>(95% CI) <sup>b</sup> | Adjusted OR<br>(95% CI) <sup>c</sup> |
| <b>Childhood abuse</b>  |                       |      |                   |      |                           |                                      |                                      |
| No abuse                | 818                   | 29.8 | 10                | 5.5  | Reference                 | Reference                            | Reference                            |
| Any abuse               | 1928                  | 70.2 | 172               | 94.5 | 7.29 (3.84, 13.87)        | 4.85 (2.42, 9.71)                    | 4.23 (2.10, 8.52)                    |
| Types of abuse          |                       |      |                   |      |                           |                                      |                                      |
| No abuse                | 818                   | 29.8 | 10                | 5.5  | Reference                 | Reference                            | Reference                            |
| Physical abuse only     | 1072                  | 39.0 | 65                | 35.7 | 4.96 (2.53, 9.71)         | 3.22 (1.56, 6.65)                    | 3.02 (1.45, 6.27)                    |
| Sexual abuse only       | 213                   | 7.8  | 17                | 9.3  | 6.53 (2.95, 14.46)        | 7.50 (3.13, 17.98)                   | 6.01 (2.47, 14.59)                   |
| Physical & sexual abuse | 643                   | 23.4 | 90                | 49.5 | 11.45 (5.91, 22.17)       | 6.87 (3.35, 14.10)                   | 5.61 (2.71, 11.59)                   |

Abbreviations: OR, odds ratio; CI, confidence interval

<sup>a</sup> PTSD is defined as PCL-C score  $\geq$  44.

<sup>b</sup> Adjusted for age (years) at interview, maternal ethnicity, difficulty paying for the basics, and depression measured by the PHQ-9.

<sup>c</sup> Further adjusted for lifetime intimate partner violence
